# Supplementary material for: Fire Risk Analysis in Large Multi-Compartment Structures Using a Hybrid Multiscale Approach
Source: MDPI journal article supplement (doi:10.3390/app12094123), 2022-04-19
Supplement: s1 [file applsci-1659776-supplementary.pdf › applsci-1659776-supplementary.pdf]

**Supplementary materials:** The following supporting information can be downloaded at: [www.mdpi.com/10.3390/app12094123](http://www.mdpi.com/10.3390/app12094123): Figure S1: Deck plans of the corvette, showing ceiling insulation. Figure S2: Deck plans of the corvette, showing bulkhead and hull insulation.

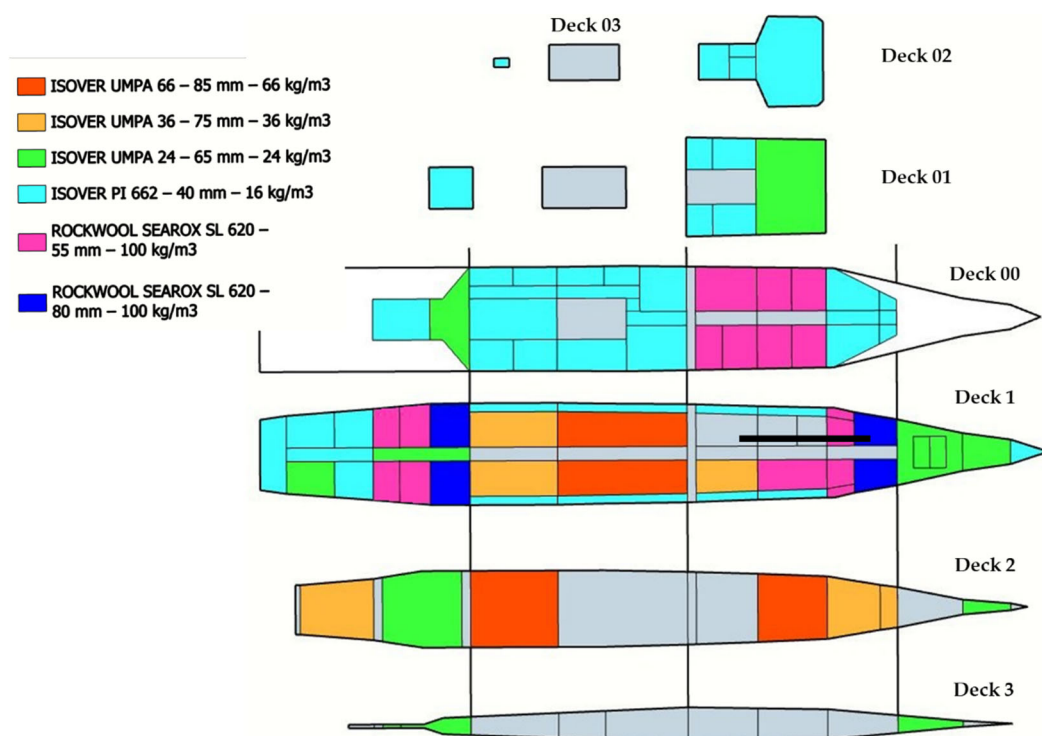

**Figure S1 :** Deck plans of the corvette, showing ceiling insulation.

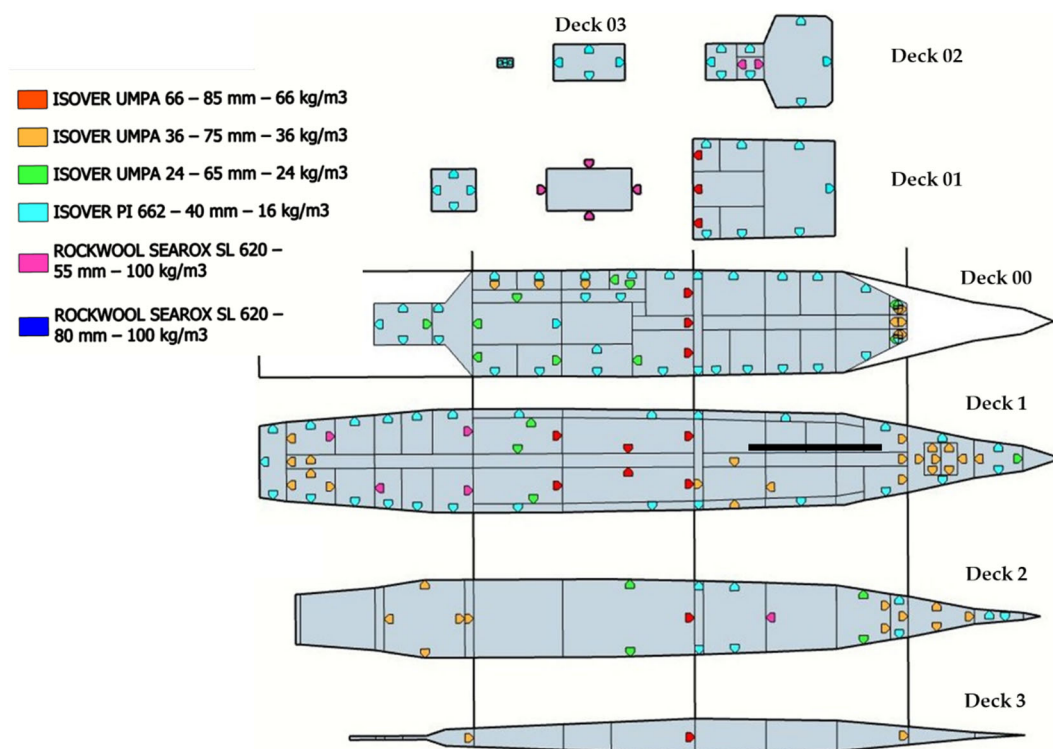

**Figure S2 :** Deck plans of the corvette, showing bulkhead and hull insulation.
